1 **Running head: Indigenous plants promote urban insect diversity**

2 **Title: Indigenous plants promote insect biodiversity in urban greenspaces**

3 Luis Mata<sup>1\*</sup>, Alan N. Andersen<sup>2</sup>, Alejandra Morán-Ordóñez<sup>3</sup>, Amy K. Hahs<sup>4</sup>, Anna  
4 Backstrom<sup>1</sup>, Christopher D. Ives<sup>5</sup>, Daniel Bickel<sup>6</sup>, David Duncan<sup>7</sup>, Estibaliz Palma<sup>7</sup>,  
5 Freya Thomas<sup>1</sup>, Kate Cranney<sup>1,8</sup>, Ken Walker<sup>9</sup>, Ian Shears<sup>10</sup>, Linda Semeraro<sup>11</sup>,  
6 Mallik Malipatil<sup>11,12</sup>, Melinda L. Moir<sup>13</sup>, Michaela Plein<sup>14</sup>, Nick Porch<sup>15</sup>, Peter A.  
7 Vesk<sup>7</sup>, Tessa R. Smith<sup>1,16</sup> and Yvonne Lynch<sup>10</sup>

8 <sup>1</sup> Centre for Urban Research, School of Global, Urban and Social Studies, RMIT  
9 University, Melbourne 3000, Australia.

10 <sup>2</sup> Research Institute for the Environment and Livelihoods, Charles Darwin University,  
11 Darwin 0909, Australia.

12 <sup>3</sup> Inforest Joint Research Unit (CTFC-CREAF), Solsona 25280, Spain.

13 <sup>4</sup> School of Ecosystem and Forest Sciences, University of Melbourne, Parkville 3010,  
14 Australia.

15 <sup>5</sup> School of Geography, University of Nottingham, Nottingham NG7 2RD, United  
16 Kingdom.

17 <sup>6</sup> Australian Museum Research Institute, Australian Museum, Sydney 2010, Australia.

18 <sup>7</sup> School of BioSciences, University of Melbourne, Parkville 3010, Australia.

19 <sup>8</sup> The Commonwealth Scientific and Industrial Research Organisation (CSIRO),  
20 Clayton 3168, Australia.

21 <sup>9</sup> Science Department, Museum Victoria, Carlton 3053, Australia.

22 <sup>10</sup> City of Melbourne, Melbourne 3000, Australia.

23 <sup>11</sup> Agriculture Victoria Research, Centre for AgriBioscience, Department of Jobs,  
24 Precincts and Regions, Bundoora 3083, Australia.

25 <sup>12</sup> School of Applied Systems Biology, La Trobe University, Bundoora 3083,  
26 Australia.

27 <sup>13</sup> School of Biological Sciences, University of Western Australia, Crawley 6009,  
28 Australia.

29 <sup>14</sup> Administration de la Nature et des Forêts, Diekirch 9233, Luxembourg.

30 <sup>15</sup> School of Life and Environmental Sciences, Deakin University, Geelong 3216,  
31 Australia.

32 <sup>16</sup> School of Natural Sciences, University of Tasmania, Hobart 7001, Australia.

33 \* Corresponding author

34 **Abstract** (max 350 words)

35 The contribution of urban greenspaces to support biodiversity and provide benefits for  
36 people is increasingly recognised. However, ongoing management practices still  
37 favour (1) vegetation oversimplification, often limiting greenspaces to lawns and tree  
38 canopy rather than multi-layered vegetation that includes under and midstorey; and  
39 (2) the use of nonnative plant species. These practices likely hinder the potential of  
40 greenspaces to sustain indigenous biodiversity, particularly for taxa like insects, that  
41 rely on plants for food and habitat. Yet, little is known about which plant species may  
42 maximise positive outcomes for taxonomically and functionally diverse insect  
43 communities in urban greenspaces. Additionally, while urban environments are  
44 expected to experience high rates of introductions, quantitative assessments of the  
45 relative occupancy of indigenous vs. introduced insect species in greenspace are rare  
46 – hindering understanding of how greenspace management may promote indigenous  
47 biodiversity while limiting the establishment of introduced insects. Using a  
48 hierarchically replicated study design across 15 public parks, we recorded occurrence  
49 data from 552 insect species on 133 plant species – differing in planting design

50 element (lawn, midstorey and tree canopy), midstorey growth form (forbs, lilioids,  
51 graminoids and shrubs) and origin (nonnative, native and indigenous) – to assess: (1)  
52 the relative contributions of indigenous and introduced insect species and (2) which  
53 plant species sustained the highest number of indigenous insects. Our data indicates  
54 that the insect community was predominately composed of indigenous rather than  
55 introduced species. Our findings further highlight the core role of multi-layered  
56 vegetation in sustaining high insect biodiversity in urban areas, with indigenous  
57 midstorey and canopy representing key elements to maintain rich and functionally  
58 diverse indigenous insect communities. Intriguingly, graminoids supported the  
59 highest indigenous insect richness across all studied growth forms by plant origin  
60 groups. Taken together, our study emphasise the opportunity posed by indigenous  
61 understory and midstorey plants, particularly indigenous graminoids in our study area,  
62 to promote indigenous insect biodiversity in urban greenspaces. Our work provides a  
63 blueprint and stimulus for built-environment professionals to incorporate into their  
64 practice plant species palettes that foster a larger presence of indigenous over  
65 regionally native or nonnative plant species, whilst incorporating a broader mixture of  
66 midstorey growth forms.

67 **Key words:** Bayesian inference, Greenspace design and management, Invertebrates,  
68 Nature in cities, Plant-insect metanetwork, Species-specific responses, Urban ecology

## 69 **Introduction**

70 Urban greenspaces provide well-documented benefits for biodiversity and people.  
71 Remnant bushland, parks, gardens, golf courses, greenroofs, pop-up parks and other  
72 types of greenspace support a great diversity of microbial, fungal, plant and animal  
73 species (Madre et al. 2013, Aronson et al. 2014, Baldock et al. 2015, Beninde et al.  
74 2015, McGregor-Fors et al. 2016, Mata et al. 2017, Threlfall et al. 2017, Baldock et

75 al. 2019, Mata et al. 2019), and provide a diverse array of health, mental, cognitive,  
76 social, cultural and spiritual benefits for people who interact with them (Keniger et al.  
77 2013, Dadvand et al. 2015, Hartig and Kahn 2016, Flies et al. 2017, Maller et al.  
78 2018, Lai et al. 2019, Mata et al. 2020). Hence, researchers, practitioners, built-  
79 environment professionals and policymakers are increasingly working together to  
80 promote the positive socio-ecological outcomes of greenspaces (Aronson et al. 2017,  
81 Lepczyk et al. 2017, Nilon et al. 2017, Parris et al. 2018, Soanes et al. 2019). Further,  
82 the importance of greenspaces has been recently highlighted at an international policy  
83 level with the United Nations' New Urban Agenda committing to "promoting the  
84 creation and maintenance of well-connected and well-distributed networks of open,  
85 multipurpose, safe, inclusive, accessible, green and quality public spaces" (United  
86 Nations 2017).

87 An ubiquitous practice that can hinder the potential of greenspaces to support  
88 biodiversity is the oversimplification of vegetation structure (Le Roux et al. 2014,  
89 Threlfall et al. 2016), which has led many greenspaces to be vegetated by only two  
90 planting design elements: lawn and tree canopy (Ignatieva et al. 2015, Aronson et al.  
91 2017). In contrast, greenspaces with a more complex, multi-layered vertical structure  
92 – those including understorey and midstorey vegetation (henceforth midstorey for  
93 brevity) – provide positive outcomes for a taxonomically and functionally diverse  
94 range of taxa (Beninde et al. 2015, Mata et al. 2017, Threlfall et al. 2017, Majewska  
95 and Altizer 2020). Unlike the lawn and tree canopy, the midstorey is a heterogenous  
96 mix of different plant growth forms, including forbs, graminoids, lilioids and shrubs  
97 amongst others. Yet, at present, the combination of plant species and growth forms  
98 that maximise positive outcomes for non-plant species in the midstorey remains  
99 poorly understood.

100 An additional issue that limits biodiversity in urban areas is that most non-remnant  
101 greenspaces, particularly intensively manicured ones such as residential gardens and  
102 public parks, are composed predominately of nonnative plant species (Threlfall et al.  
103 2016). Nonnative plants are rarely well-suited to provide resources for indigenous  
104 primary consumers (e.g. herbivorous insects and frugivorous birds), nor to indigenous  
105 secondary and apex consumers (e.g. predatory and parasitoid insects and  
106 insectivorous birds and bats) that depend on primary consumers as food resources  
107 (Ballard et al. 2013, Burghardt and Tallamy 2013, Ikin et al. 2013, Salisbury et al.  
108 2015, Threlfall et al. 2017). These studies highlight how management practices that  
109 promote the use of nonnative plants are likely to reduce the capacity of greenspaces to  
110 sustain diverse communities of indigenous biodiversity.

111 In most of the studies to date, plant origin has been treated as an aggregate plot-level  
112 explanatory variable (e.g. treatment plot as either nonnative or native; plot nativeness  
113 as percentage cover of native vegetation). A focus on plant species rather than plot as  
114 the unit of analysis allows for a more nuanced understanding of how plant origin may  
115 influence the capacity of plants to provide resources for associated consumer species.  
116 Moreover, focusing on the plant species level may advance understanding of how  
117 plant origin interacts with other plant-level attributes — such as planting design  
118 element and growth form — to produce positive outcomes for consumer species,  
119 particularly of taxa that rely extensively on plants for food and habitat resources, such  
120 as insects.

121 Insects are a particularly important component of urban biodiversity (Sattler et al.  
122 2011, New 2015) and the ecological functions they perform provide numerous  
123 benefits to urban residents (Prather et al. 2013, Benett and Lovell 2014, Baldock et al.  
124 2015), along with some disbenefits (Dunn 2010, Rust and Su 2012). Plants and

125 insects have often coevolved in close association with each other, with many insect  
126 species showing high levels of specialisation (Forister et al. 2012). Plants also provide  
127 food, foraging, nesting, oviposition, shelter and overwintering resources to insect  
128 detritivores, predators and parasitoids; indeed, practices that promote these resources  
129 in agroecosystems by fostering plant diversity and structural complexity are key  
130 components of pest management strategies (Landis et al. 2000). The availability of  
131 suitable host plants within greenspaces is therefore a key determinant of insect  
132 diversity in urban environments (Aronson et al. 2016). However, as far as we are  
133 aware no study has sought to identify specific plant species of differing origins and  
134 growth forms that promote taxonomically and functionally diverse insect  
135 communities in urban greenspaces.

136 Urban environments are central nodes of human-mediated dispersal networks  
137 (Bullock et al. 2018) and hotspots of novel resource utilisation (Valentine et al. 2020),  
138 and introduced species are therefore often prominent (Cadotte et al. 2017, Paap et al.  
139 2017). The number of introduced insect species can be relatively low (Madre et al.  
140 2013, Mata et al. 2017), but they often occur in high abundance and this is especially  
141 the case for generalist bees and butterflies (Matteson & Langellotto 2010, Threlfall et  
142 al. 2015). However, as far as we are aware, no quantitative assessments of the relative  
143 contributions of indigenous and introduced species in greenspace insect communities  
144 have been reported in the literature. This paucity of data hinders understanding of  
145 how greenspaces may be managed to promote indigenous insect biodiversity while  
146 limiting the establishment of introduced species.

147 Here we use a plant-insect metanetwork dataset collected across 15 greenspaces  
148 within a densely urbanised inner-city municipality to assess: (1) the relative  
149 contributions of indigenous and introduced species in insect communities of urban

150 environments, and (2) which plant species should be planted to support indigenous  
151 insect species. The project followed the science-government partnerships model (Ives  
152 and Lynch 2014) – an approach that advocates for industry professionals and  
153 researchers to work in close association to guarantee that theoretically interesting and  
154 practically important questions are identified. This ensured that the implications of  
155 our research findings could be applied as practical on-ground actions that were  
156 embedded into a new business as usual at the City of Melbourne. We began by  
157 determining what proportion of insect species occurring in the greenspaces are  
158 indigenous, and whether indigenous insect species are more common than introduced  
159 species. We then examined how the richness of indigenous insect species varies with  
160 planting design element (lawn, midstorey and tree canopy), midstorey growth form  
161 (forbs, lilioids, graminoids and shrubs) and plant origin groups (nonnative, native and  
162 indigenous). Finally, we grouped plants species according to a combination of  
163 planting design element by plant origin (Fig. 1a), and midstorey growth form by plant  
164 origin (Fig. 1b) to assess how the richness of indigenous insect species vary amongst  
165 these groups. We do this assessment for the whole insect community and for five key  
166 functional groups: pollinators and other flower-visiting taxa, herbivores, predators,  
167 parasitoids and detritivores. We also examined variation amongst the plant groups in  
168 insect species composition and number of unique species.

## 169 **Methods**

### 170 **Study design**

171 The study was conducted in the City of Melbourne, Australia. This is one of 31  
172 municipalities within Greater Melbourne, a large metropolitan area spanning  
173 approximately 10,000 km<sup>2</sup> within the Urban Growth Boundary and home to over five  
174 million people (Victorian State Revenue Office: [7](https://www.sro.vic.gov.au/greater-</a></p></div><div data-bbox=)

175 melbourne-map-and-urban-zones). The City of Melbourne covers 37.7 km<sup>2</sup> and  
176 incorporates a central business district, transport and distribution hubs. Approximately  
177 13% of the land area is covered by vegetated open space, including grassy woodlands,  
178 wetlands, estuaries and a greenspace network of parks, gardens and streetscapes. The  
179 municipality is home to approximately 180,000 residents and receives approximately  
180 900,000 daily visitors (City of Melbourne: <https://www.melbourne.vic.gov.au/>).

181 Our study was conducted across 15 public parks, which varied in size across four  
182 orders of magnitude (1.1 x 10<sup>3</sup> m<sup>2</sup> – 1.3 x 10<sup>6</sup> m<sup>2</sup>; Appendix 1: Table S1; Appendix 1:  
183 Fig. S1a). We established a total of 130 plots across the 15 parks, with the number of  
184 plots in each park (2-36), and their size (84-148 m<sup>2</sup>), varying according to the park's  
185 area (Appendix S1: Eq. S1-S3) and planting design elements and midstorey growth  
186 forms present (Appendix 1: Table S1; Appendix 1: Fig. S1b). Within each plot we  
187 identified all plants, totalling 133 species, genera or species complexes across the  
188 study area (Appendix S2: Table S2).

189 We classified plant species by origin as indigenous (n=30), regionally native (n=9)  
190 and nonnative (n=94). We define indigenous plant species – also referred to in the  
191 literature as locally native – as those that are native to the local bioregions. For this  
192 study, indigenous plant species are those that occurred before European settlement in  
193 the Volcanic Victorian Plain and Gippsland Plain bioregions, (State of Victoria:  
194 <https://www.environment.vic.gov.au/>). Regionally native (henceforth native) are  
195 species that are native to Australia but not to the local bioregions and have been  
196 anthropogenically introduced. Nonnative species are those that have been introduced  
197 to Australia.

198 We also classified plant species by planting design element (henceforth design  
199 element) as lawn complex (n=41), midstorey (n=67) and tree canopy (n=25) (Fig. 1a).



200 Midstorey taxa were further stratified by growth form as forb (n=8), lilioid (n=13),  
201 graminoid (n=8) and shrub (n=38) (Fig. 1b). We define lawn complexes (henceforth  
202 lawns) as patches dominated by turf forming grasses (Poaceae) intermixed with one  
203 or more small, ruderal herbaceous species. Midstorey species included broad-leaved  
204 perennial and annual herbaceous plants (forbs); petaloid monocots in orders Liliales  
205 and Asparagales (lilioids); grasses, sedges and rushes of typically vertical habit with  
206 linear foliage and inconspicuous wind pollinated flowers (graminoids); and woody  
207 perennials with multiple stems and < 5 m in height (shrubs). Tree canopy species  
208 included single-stemmed woody plants > 5 m in height.

#### 209 Insect survey

210 We sampled plant species for 12 insect groups known to dominate insect communities  
211 on above-ground vegetation: ants, bees, beetles, cicadas, flies, heteropteran bugs,  
212 jumping plant lice, leaf- and treehoppers, parasitoid wasps, planthoppers, sawflies and  
213 stinging wasps. Samples were taken by direct observation and by sweeping with an  
214 entomological net. Observation time and sweeps per plant species were standardised  
215 as a proportion of the plant species' volume within the plot (Appendix S1: Eq. S4-  
216 S5), with each plant species in each plot sampled three times from January (summer)  
217 to late March (autumn) 2015. Sampled insect specimens were processed in the  
218 laboratory and identified to species/morphospecies. We assigned these as (1) either  
219 indigenous to the studied bioregions and/or native to Australia (henceforth  
220 indigenous) or introduced to Australia, and (2) one or more of the following  
221 functional groups: pollinators and other flower-visiting taxa (henceforth pollinators),  
222 herbivores, predators, parasitoids and detritivores.

#### 223 Data analysis

224 *Estimating insect occupancy and species richness per plant species*

225 To assess the proportion of indigenous insect species occurring in the greenspaces,  
226 whether they were more common than introduced ones, and how their species  
227 richness varied amongst the studied single and combined plant groups, we analysed  
228 our data with a three-level hierarchical metacommunity occupancy model (Kéry and  
229 Royle 2016). Plant species was our unit of analysis for drawing inferences on insect  
230 species occupancy, and each repeated spatial (individuals of the same plant species  
231 sampled in different plots) and temporal (same individual of a given plant species  
232 sampled at different times) samplings constituted the unit of detection replication. We  
233 structured the model around three levels: one for species occupancy; a second for  
234 species detectability; and a third to treat the occupancy and detection parameters for  
235 each species as random effects (Kéry and Royle 2016). Specifically, we used a  
236 variation of the model described by Mata et al. (2017), in which we specified the  
237 occupancy level model as:

$$238 \quad Z_{i,j} \sim \text{Bernoulli}(\Psi_{i,j})$$

239 where  $\Psi_{i,j}$  is the probability that insect species  $i$  occurs at plant species  $j$ , and the  
240 detection level model as:

$$241 \quad y_{i,j,k} \sim \text{Bernoulli}(\Phi_{i,j,k} \cdot Z_{i,j})$$

242 where  $\Phi_{i,j,k}$  is the detection probability of insect species  $i$  at plant species  $j$  at  
243 spatiotemporal replicate  $k$ .

244 The occupancy and detection level linear predictors were specified on the logit-  
245 probability scale as:

$$246 \quad \text{logit}(\Psi_{i,j}) = \text{occ}_i$$

$$247 \quad \text{logit}(\Phi_{i,j,k}) = \text{det}_i$$

248 where  $\text{occ}_i$  and  $\text{det}_i$  are the species-specific random effects, which were specified as:

$$249 \quad \text{occ}_i \sim \text{Normal}(\mu.\text{occ}_{\text{Int...Ind}}, \tau.\text{occ})$$

250  $\text{det}_i \sim \text{Normal}(\mu.\text{det}, \tau.\text{det})$

251 where the metacommunity mean occupancy hyperpriors for introduced and  
252 indigenous insect species,  $\mu.\text{occ}_{Int}$  and  $\mu.\text{occ}_{Ind}$ , respectively, and the metacommunity  
253 mean detection hyperprior  $\mu.\text{det}$ , were specified as Uniform (0, 1); and the  
254 metacommunity precision occupancy and detection hyperpriors,  $\tau.\text{occ}$  and  $\tau.\text{det}$ ,  
255 respectively, were specified as Gamma (0.1, 0.1).

256 We then use the latent occurrence matrix  $Z_{ij}$  to estimate the insect species richness  
257 associated with each plant species  $SR_j$  through the summation:

$$SR_j = \sum_{i=S_{ij}} Z_{ij}$$

258 where  $S_{ij}$  is a ‘specificity’ vector indexing the insect species to be included in each  
259 plant species’ estimate.  $SR_j$  is then an estimate that accounts for plant-insect  
260 specificity, in which, for each plant species, the observed insect species are included  
261 with probability of occurrence = 1 and a limited random sub-sample of other insect  
262 species occurring in the study area are included with their  $0 < Z < 1$  estimated  
263 probabilities of occurrence. This allowed us to work within the reasonable ecological  
264 assumption that across the study area not every insect species will be associated with  
265 every co-occurring plant species. We conducted these estimations for the insect  
266 community as a whole but also independently for introduced and indigenous species.  
267 We estimated model parameters under Bayesian inference, using Markov Chain  
268 Monte Carlo (MCMC) simulations to draw samples from the parameters’ posterior  
269 distributions. As the species richness calculations were conducted within this  
270 modelling framework, we were able to derive the insect species per plant species  
271 estimates with their full associated uncertainties. This allowed us to average the

272 species richness estimates of plant species belonging to the same group, and therefore  
273 obtain posterior distributions for each group that we could statistically compare.  
274 Our model was implemented in JAGS (Plummer 2003) and accessed through the R  
275 package *jagsUI* (Kellner 2016). We used three chains of 5,000 iterations, discarding  
276 the first 500 in each chain as burn-in. We visually inspected the MCMC chains and  
277 the values of the Gelman-Rubin statistic to verify acceptable convergence levels of  $\hat{R}$ -  
278  $\hat{R} < 1.1$  (Gelman & Hill 2007).

### 279 *Community dissimilarity*

280 To determine whether the composition of insect species varied amongst the design  
281 elements/growth form by plant origin groups, we reorganised the data into insect-by-  
282 plant species matrices – cell values summarising the number of times a given insect  
283 species was sampled on a given plant species across its spatiotemporal replicates –  
284 and used these to calculate amongst-group community dissimilarity. Specifically, we  
285 used 1 - Jaccard similarity index as implemented in the R package *vegan* (Oksanen et  
286 al. 2016). We further used the data to create insect species lists for each group, which  
287 we partitioned into their corresponding Venn sets with the R package *VennDiagram*  
288 (Chen 2016). This allowed us to calculate the number of unique insect species –  
289 species found exclusively at a given plant group and not shared with any of the other  
290 groups – belonging to each group.

## 291 **Results**

292 Our survey recorded 552 insect species, with the richest taxa being beetles (125  
293 species), parasitoid wasps (121), flies (101), heteropteran bugs (61), leaf- and  
294 treehoppers (40) and jumping plant lice (31) (Appendix S2: Table S1). These  
295 represented 154 pollinator, 299 herbivore, 231 predator, 150 parasitoid and 231  
296 detritivore species. The most commonly occurring species was the minute brown

297 scavenger beetle *Corticicara* sp. 1 (Latridiidae), an indigenous detritivore species that  
298 accounted for 12% of all records. The Argentine ant *Linepithema humile* was the most  
299 frequently occurring introduced species, accounting for approximately 3% of all  
300 records. Four new species were also discovered: one ant, one heteropteran bug and  
301 two jumping plant lice (Mata et al. 2015, 2016).

### 302 *Indigenous vs introduced insect species*

303 There were approximately 30 times more indigenous (534) than introduced (18) insect  
304 species across the study area, with our model estimates indicating that any particular  
305 plant species was associated with 19 times more indigenous than introduced insect  
306 species (Fig. 2a; Appendix S2: Table S2). The mean number of introduced insect  
307 species found on individual plant species varied from zero to four; whereas the mean  
308 number of indigenous insect species varied from one to 109, with most plant species  
309 being associated with more than ten indigenous insect species (Fig. 2b; Appendix 2:  
310 Table S3; Appendix 2: Figure S1). The probability of occurrence of any particular  
311 insect species at a given plant across the study area was similarly low for introduced  
312 and indigenous species (Fig. 2c; Appendix 2: Table S4). The introduced insect fauna  
313 was represented by species showing moderate to very low ( $0.6 > P_{occ} > 0$ ) species-  
314 specific probabilities of occurrence (Fig. 2d; Appendix 2: Table S1); whereas the  
315 species-specific probabilities of occurrence of indigenous insect species varied  
316 widely, with a few species showing very high occupancy levels ( $P_{occ} > 0.8$ ) and most  
317 species showing low occupancy levels ( $P_{occ} < 0.4$ ) (Fig. 2d; Appendix 2: Table S1).  
318 The probability of detecting any particular insect species at a given plant across the  
319 study area was similarly very low for introduced and indigenous species ( $P_{det} < 0.03$ ;  
320 Appendix S2: Table S4), and the species-specific probabilities of detection were  
321 consistently low for the large majority of insect species (Appendix S2: Table S1).

322 *Effect of design element, growth form and plant origin*

323 Our model estimates indicate that all three design elements had different levels of  
324 indigenous insect species richness, with the average midstorey or tree canopy species  
325 showing approximately 2.5 times more insect species than the average lawn complex  
326 (Fig. 3a; Appendix S2: Table S5). Likewise, we found that the species richness of  
327 indigenous insects varied amongst midstorey growth forms, with the average  
328 graminoid species showing 2.9 times more insect species than the average lilioid, 2.4  
329 times more than the average forb and 1.8 times more than the average shrub (Fig. 3b;  
330 Appendix S2: Table S5). Our estimates further indicate marked statistical differences  
331 with plant origin in the number of indigenous insect species (Appendix 2: Figure S1),  
332 with the average indigenous plant species showing 2.9 and 1.6 times more insect  
333 species than the average nonnative and native plant, respectively; and the average  
334 native plant showing 1.9 times more insect species than the average nonnative plant  
335 (Fig. 3c; Appendix S2: Table S5).

336 *Combined effect of design element and plant origin*

337 Our model estimates indicate that all design element by plant origin groups had  
338 different levels of indigenous insect species richness. In general, indigenous groups  
339 were associated with higher species richness than native and these with higher  
340 richness than nonnative. The single exception was native midstorey and nonnative  
341 tree canopy, which showed insect species richness levels that were not statistically  
342 different from each other (Fig. 4a; Appendix S2: Table S6). Overall, the indigenous  
343 midstorey was associated with the highest level of indigenous insect species richness,  
344 with the average plant species in this group showing 2.6 and 1.6 times more insect  
345 species than the average nonnative and native midstorey plant species, respectively  
346 (Fig. 4a; Appendix S2: Table S6). The indigenous tree canopy was associated with the

347 second highest level of insect species richness, with the average plant species in this  
348 group showing 1.8 and 1.4 times more insect species than the average nonnative and  
349 native tree canopy plant species, respectively (Fig. 4a; Appendix S2: Table S6).

350 Across insect functional groups, lawns showed the lowest insect species richness (Fig.  
351 5a,c,e,g,i; Appendix S2: Table S6). The indigenous midstorey showed the highest  
352 number of indigenous insect species; however, for predators and detritivores the  
353 indigenous midstorey was not statistically different to the indigenous tree canopy  
354 (Fig. 5e,i; Appendix S2: Table S6). Other departures from the general pattern were  
355 observed for each functional group. The indigenous and native tree canopy groups did  
356 not show different levels of indigenous pollinators or parasitoid species (Fig. 5a,g;  
357 Appendix S2: Table S6), and the native tree canopy and midstorey groups did not  
358 show different levels of indigenous herbivore species (Fig. 5c; Appendix S2: Table  
359 S6). For predators, parasitoids and detritivores, the nonnative tree canopy group has a  
360 higher species richness than the native midstorey and was not statistically different  
361 than the native tree canopy – the native and nonnative midstorey groups in turn did  
362 not show different levels of associated species (Fig. 5e,g,i; Appendix S2: Table S6).

### 363 *Combined effect of growth form and plant origin*

364 Our model estimates indicate that the species richness of indigenous insects varied  
365 amongst the growth form by plant origin groups. In general, indigenous groups had  
366 higher insect species richness than did native and these had higher insect richness than  
367 nonnative (Fig. 4b; Appendix S2: Table S6). The group with the highest insect species  
368 richness was indigenous graminoids, with the average plant species in this group  
369 showing nearly five times more species than the average nonnative graminoid (Fig.  
370 4b; Appendix S2: Table S6). Indigenous shrubs were associated with the second  
371 highest level of insect species richness, with the average indigenous shrub showing

372 2.1 and 1.6 times more insect species than average nonnative and native shrubs,  
373 respectively (Fig. 4b; Appendix S2: Table S6). The group with the third highest insect  
374 species richness was indigenous lilioids, with the average indigenous lilioid showing  
375 2.5 times more insect species than the average nonnative lilioid (Fig. 4b; Appendix  
376 S2: Table S6).

377 Indigenous graminoids showed the highest number of indigenous insect species  
378 across all insect functional groups (Fig. 5b,d,f,h,j; Appendix S2: Table S6). In  
379 general, the indigenous growth form groups were associated with the highest number  
380 of indigenous insect species across all insect functional groups (Fig. 5b,d,f,h,j;  
381 Appendix S2: Table S6).

#### 382 *Community composition and unique species*

383 Indigenous insect community composition varied markedly across the design  
384 elements by plant origin (Fig. 6a) and growth forms by plant origin (Fig. 6b) groups.  
385 The insect composition of a few group pairs was markedly similar such as between  
386 indigenous and native midstorey (5%; Fig. 6a) and between nonnative graminoids and  
387 shrubs (5%; Fig. 6b). However, most group pairs showed moderate to high  
388 dissimilarity (> 20%) in species composition, for example, between native and  
389 nonnative tree canopy (32%; Fig. 6a) and between nonnative forbs and lilioids (40%;  
390 Fig. 6b).

391 The number of unique insect species also varied substantially across groups (Fig. 6).  
392 Within the design element by plant origin group, up to 33% of all indigenous insect  
393 species recorded in the study were unique to the indigenous groups followed by their  
394 nonnative and native counterparts, with 12% and 6% unique species, respectively  
395 (Fig. 6a). From the design element perspective, 30% of all indigenous insect species  
396 recorded in the study were unique to the midstorey groups, followed by their tree



397 canopy and lawn counterparts, with 19% and 2% unique species, respectively (Fig.  
398 6a). Similarly, within the growth form by plant origin group, as much as 29% of all  
399 indigenous insect species recorded in the midstorey were unique to the three  
400 indigenous groups, followed by their nonnative and native counterparts, with 11% and  
401 3% unique species, respectively (Fig. 6b). From the growth form perspective, 24% of  
402 all indigenous insect species recorded in the midstorey were unique to the shrub  
403 groups, followed by the graminoid, forb and lilioid groups, with 14%, 3% and 2%  
404 unique species, respectively (Fig. 6b).

#### 405 **Discussion**

406 Our findings demonstrate that taxonomically and functionally diverse indigenous  
407 insect communities occur in greenspaces in densely urbanised inner-city  
408 municipalities such as the City of Melbourne, with the potential to boost ecosystem  
409 multifunctionality (Soliveres et al. 2016) and biotic resistance against the  
410 establishment of introduced insects (Kennedy et al. 2002). We have shown that insect  
411 communities in Melbourne greenspaces are predominately composed of indigenous  
412 rather than introduced species. Our study further highlights that multi-layered,  
413 structurally complex indigenous vegetation plays a core role in sustaining high insect  
414 biodiversity in urban areas, with the indigenous midstorey and canopy key to  
415 maintaining a rich and functionally diverse indigenous insect community within this  
416 system. Within the indigenous midstorey, graminoids surprisingly support the highest  
417 indigenous insect species richness across all functional groups – particularly for  
418 herbivores, predators and detritivores – followed by indigenous shrubs and lilioids.  
419 The indigenous midstorey also hosts the largest percentage of unique species. Taken  
420 together our findings emphasise the opportunity presented by indigenous understory

421 and midstorey plants, particularly indigenous graminoids in our study area, to  
422 promote indigenous insect biodiversity in urban greenspaces.

423 *Greenspace insect communities are dominated by indigenous insect species*

424 Our results indicate that the insect community in our study area was composed  
425 predominately of indigenous species. This finding aligns with previous studies of  
426 insect richness in cities across other continents (Goertzen and Suhling 2014, Sing et  
427 al. 2016, Brown and Hartop 2017). Despite the expectation that urban environments  
428 act as hotspots for biological invasions (Cadotte et al. 2017), particularly of nonnative  
429 plants and insects (Pysek et al 2010), we found a relatively low number of introduced  
430 insect species. Interestingly however, some of these introduced species, for example  
431 the European honeybee *Apis mellifera*, were common in and widespread across the  
432 studied greenspaces. Consequently, the probability of occurrence of introduced insect  
433 species on any particular plant across the study area is similar than that of indigenous  
434 species.

435 *Indigenous plant species promote indigenous insect diversity*

436 We found multiple threads of evidence to suggest that indigenous plant species  
437 sustain the highest numbers of indigenous insect species and host the largest  
438 percentage of unique species. It is generally accepted in restoration ecology that the  
439 presence of indigenous plant species promotes recolonisation by indigenous insect  
440 species (Moir et al. 2005, Nemeč and Bragg 2008). In most cases, phytophagous taxa  
441 drive this trend (Procheş et al. 2008, Woodcock et al. 2009) and it is a function of the  
442 host-specificity of the insect species, provided that other factors are accounted for,  
443 such as the insect's power of dispersal and suitable micro-climate conditions (Moir et  
444 al. 2005).

445 It follows, therefore, that indigenous plants should encourage the occurrence of  
446 indigenous insects, especially for herbivores, but also for other insect functional  
447 groups. Indeed, our findings distinctly show that pollinators, herbivores, predators,  
448 parasitoid and detritivores reach higher levels of species richness in association with  
449 indigenous plant species. Experimental studies also support this assumption (Ballard  
450 et al. 2013, Burghardt and Tallamy 2013, Salisbury et al. 2015, 2017). For example,  
451 using experimental plantings of tree and shrub species, Burghardt and Tallamy (2013)  
452 showed that nonnative plants supported less diverse herbivorous insect communities  
453 than indigenous plants. Similarly, in an early successional experiment the biomass,  
454 abundance and species richness of herbivorous, predatory and parasitoid insects was  
455 lower on nonnative forbs than on indigenous forbs (Ballard et al. 2013). Working  
456 specifically in an urban setting, Salisbury and colleagues (2015, 2017) experimented  
457 with the origin of flowering plants in garden borders, demonstrating that insects  
458 across a diverse range of functional groups were less abundant on nonnative than  
459 indigenous plant species. These experimental findings have been substantiated by  
460 observational approaches, particularly by studies conducted within urban  
461 environments. For instance, a study that included the species-specific responses of  
462 bees, beetles and heteropteran bugs to vegetation attributes of gardens, parks and golf  
463 courses revealed how occurrence probabilities for most insect species decreased as a  
464 function of the amount of nonnative plants present in the studied greenspaces  
465 (Threlfall et al. 2017).

#### 466 *Midstorey as a key planting design element*

467 Our results have shown that the midstorey is a highly valuable ecological asset in  
468 urban landscapes in terms of promoting insect diversity. Midstorey vegetation –  
469 which in our study also included plants species associated with the understorey –

470 harboured nearly as many indigenous insect species as canopy vegetation. Indigenous  
471 midstorey plant species in particular promoted higher levels of overall insect richness,  
472 a pattern that was consistent across all insect functional groups. The midstorey also  
473 sustained the highest number of unique indigenous insect species. Taken together, our  
474 results indicate that the under- and midstorey are underappreciated strata with great  
475 potential for supporting insect biodiversity across urban environments.

476 Our findings go beyond the accepted understanding that the greater structural  
477 complexity of experimental, restored or managed sites, the higher the taxonomical  
478 and functional diversity of insects and other invertebrates (Murdoch et al. 1972,  
479 Brown 1984, Majer et al. 2007, Woodcock et al. 2009, Gibb and Cunningham 2010,  
480 Mata et al. 2017, Threlfall et al. 2017, Schuldt et al. 2019). We show that within the  
481 midstorey it is the indigenous species – particularly indigenous graminoids and shrubs  
482 – that distinctly outperform their native and nonnative counterparts. Our results are  
483 also consistent with previous studies that have documented how insect and other  
484 arthropod communities are highly stratified across forest strata (Basset et al. 2003,  
485 Ulyshen 2011). It is likely that greenspace midstorey vegetation supports different  
486 insect taxa due to differences in habitat structure (e.g. foliage complexity or plant  
487 surface textures), microclimate (e.g. light, temperature, wind or humidity differences),  
488 unique food resources or particular inter-specific interactions, as has been discussed  
489 for temperate deciduous forest (Ulyshen 2011). Unpacking the causal mechanisms for  
490 our results would require experimental manipulations that fell beyond the scope of  
491 this study.

#### 492 *Graminoids as a key midstorey growth form*

493 A striking result to emerge from the data is that graminoids sustain the highest  
494 number of indigenous insect species across all growth forms and indigenous

495 graminoids show the highest species richness of indigenous insects across all growth  
496 form by plant origin groups. Three indigenous tussock grass species made particularly  
497 important contributions to supporting indigenous insect biodiversity in our study area:  
498 common tussock-grass *Poa labillardierei*, wallaby grass *Rytidosperma sp.* and  
499 kangaroo grass *Themeda triandra*. Indeed, *P. labillardierei* had the highest number of  
500 indigenous insect species across the study, with any particular tussock grass patch  
501 supporting as much as 5.4 times more indigenous insect species than the most  
502 speciose lawn complex and 1.7 times more indigenous insect species than the spotted  
503 gum *Corymbia maculata*, which was the tree species sustaining the highest number of  
504 indigenous insect species across the study. These results substantiate previous  
505 findings stressing the relevance of indigenous tussocks and other structurally complex  
506 graminoids in providing a diversity of habitat and food resources for the immature  
507 and adult life stage of insects and other invertebrates (Tschardt and Greiler 1995,  
508 Morris 2000, Barratt et al. 2005).

509 Remarkably, the capacity of indigenous graminoids to support the highest levels of  
510 indigenous insect species across all studied plant groups was true for all insect  
511 functional groups. This finding extends previous studies reporting on the positive  
512 effects of tussocks and other graminoids on specific insect functional groups –  
513 predominantly on herbivores, predators and parasitoids (Dennis et al. 1998,  
514 Woodcock et al. 2007, Haaland et al. 2011), but also for pollinators (Saarinen et al.  
515 2005, Potts et al. 2009). Our finding that graminoids, which are predominantly  
516 pollinated by wind, support more pollinators and other flower-visiting insect species  
517 than do lilioids or shrubs, which are predominantly pollinated by insects, is highly  
518 noteworthy and provides insight into function and value of non-floral resources for  
519 insect pollinators (Roulston and Goodell 2011, Requier and Leonhardt 2020). We

520 hope that our research will serve as a base for future studies on the capacity of  
521 graminoids to provide habitat and food resources for insects in urban greenspaces,  
522 particularly of non-floral resources for pollinators and other flower-visiting species.  
523 Beyond graminoids, our data further emphasises the contributions of other midstorey  
524 growth forms. For instance, indigenous shrubs and lilioids sustained the second and  
525 third highest number of indigenous insect species across the growth form by plant  
526 origin groups. Indeed, our findings indicate that any particular indigenous shrub or  
527 lilioid species supports the same number of indigenous insect species as any particular  
528 indigenous tree species; and substantially more insect species than any particular  
529 native or nonnative tree species. However, we found that the number of unique  
530 indigenous insect species varied markedly between these two plant groups, with  
531 indigenous shrubs showing as much as 7.4 times more unique insect species than their  
532 lilioid counterparts. In general, shrubs outperformed all other midstorey growth  
533 forms, with approximately one out of every four indigenous insect species across the  
534 study being exclusively associated with shrub species.

535 As underlined by an increasing body of literature (Mata et al. 2017, Threlfall et al.  
536 2017, Aguilera et al. 2019, Norton et al. 2019, Majewska and Altizer 2020), including  
537 recent reviews (Burkman and Gardiner 2014, Aronson et al. 2017), and meta-analyses  
538 (Beninde et al. 2015), the evidence we found points to the critical role that midstorey  
539 growth forms – particularly indigenous plant species – play in supporting  
540 taxonomically and functionally diverse indigenous insect communities in urban  
541 greenspaces. This finding is not only critical for insect conservation in urban  
542 environments but of direct, immediate relevance for a wide range of animals such as  
543 reptiles, birds and mammals that rely on them as a primary or complementary food  
544 source. Our findings therefore underscore the potential of a diverse, primarily

545 indigenous understorey and midstorey strata to increase the positive biodiversity  
546 outcomes provided by structurally complex vegetation. As such, they support ideas  
547 that move beyond the stagnant approach of designing urban greenspaces  
548 predominantly or often exclusively with nonnative short turfgrass lawn and tall trees  
549 (Ikin et al. 2015, Smith et al. 2015, Parris et al. 2018, Norton et al. 2019).

#### 550 *Limitations and future research*

551 We are aware of some features of our study context and design that might have  
552 influenced our results. Firstly, the small proportion of introduced insects found in this  
553 study may be the result of recent introductions that have not yet had enough time to  
554 develop into established, large populations – a pattern that is common to both the  
555 Northern (Roques et al. 2009) and Southern Hemispheres (Ward and Edney-Browne  
556 2015). It is therefore not inconceivable that some introduced species occurring in our  
557 study area in small, isolated populations might have gone undetected. Indeed, a recent  
558 follow up study in one of the study sites revealed the occurrence of the European  
559 firebug *Pyrrhocoris apterus* – a Palaearctic species not previously recorded in  
560 Australia (LM unpublished data). As with any observational study, our study design  
561 may have introduced unintended bias because our data collection period was  
562 purposely designed to coincide with the peak activity season for insects in our study  
563 area (i.e., the summer months). We believe however that this effect is negligible as far  
564 fewer insect species are more active over the colder periods.

565 This research has revealed many questions in need of further investigation. While we  
566 believe that our finding, that indigenous plants sustain substantially more indigenous  
567 insect species than their regionally native and nonnative counterparts, are transferable  
568 to other urban environments worldwide, the strong relationships we found between  
569 indigenous graminoids and indigenous insects might be less transferable. While

570 graminoids, particularly tussock forming species, were a dominant growth form in our  
571 study area before colonial settlement other growth forms might have been more  
572 representative in other bioregions. A global study across many bioregions is needed to  
573 shed light on this question.

574 While we have emphasised the critical role of indigenous plants, we have also shown  
575 that indigenous insects are being found in association with a wide array of regionally  
576 native and nonnative plants. Thus, our study provides considerable insights in support  
577 of the idea that urban environments may facilitate novel resource utilisation  
578 (Valentine et al. 2020). We recommend future experimental work on this topic to  
579 clarify to what extent these associations reflect host shifting patterns unique to urban  
580 environments and to fully understand the opportunities and risks provided by novel  
581 urban resources. On a wider level, research is also needed to determine to what extent  
582 the increases in insect biodiversity provided by complementing lawns and trees with a  
583 diverse palette of midstorey growth forms, particularly indigenous species, can boost  
584 ecosystem multifunctionality in urban greenspaces – as recently demonstrated for  
585 meso- and macrofauna influencing soil multifunctionality (Tresch et al. 2019). The  
586 prospect of being able to understand the mechanistic links between, and to quantify  
587 the contributions of, increased biodiversity due to greenspace management actions  
588 and greenspace multifunctionality serves as a continuous incentive to future research.

#### 589 *Implications for greenspace design and management*

590 As our research was conducted following the science-government partnerships model  
591 (Ives and Lynch 2014), our findings have now been used by the City of Melbourne to  
592 provide practical guidance for designing greenspaces that meet the needs of both  
593 people and nature. We share these examples of applied ecological knowledge here as  
594 a demonstration of how this ecological research can inform practical actions.



595 In the first instance, our study provides a blueprint and stimulus for built-environment  
596 professionals, including architects, engineers, planners and designers, to conceptualise  
597 and incorporate into their practice palettes of plant species that foster a larger  
598 presence of indigenous plants over regionally native or nonnative species, whilst  
599 incorporating a broader mixture of midstorey growth forms. These features are  
600 expected to promote taxonomically and functionally diverse indigenous insect  
601 communities – even when increasing the amount of greenspace is not feasible due to  
602 other pressures (Beninde et al 2015). Integrating these plant palettes into practice may  
603 further allow built-environment professionals to plan and design complex plant  
604 communities that support and boost indigenous biodiversity in greenspaces and that  
605 will likely contribute to bring locally extinct or rare species back into urban  
606 environments (Baruch et al. 2020, Mata et al. 2020).

607 Another promising pathway that can be explored by greenspace professionals  
608 includes identifying locations where lawns can be converted to more complex  
609 vegetation that includes indigenous plants, particularly, at least in the bioregional  
610 context of our study, graminoids, shrub and lilioids. Simple strategies for  
611 incorporating more complex vegetation without compromising access to lawn areas  
612 include placing the plantings around the greenspace boundaries or under the canopy  
613 areas of larger trees where they can also act as a subtle exclusion zone and reduce the  
614 risk of injury due to falling limbs or branches. Placing the taller midstorey plantings  
615 away from footpaths and other infrastructure can also help meet ‘Crime Prevention  
616 Through Environmental Design’ principles by maintaining a line of site (Piroozfar et  
617 al. 2019).

618 *Making a difference – implications for policy and beyond*

619 Through our study we have gained considerable insights that advance knowledge of  
620 plant-insect relationships in urban greenspaces. However, to bring about beneficial  
621 outcomes for urban landscapes, this scientific evidence must be embedded into policy  
622 and, ultimately, operationalised into practice. Indeed, our research was conducted as  
623 part of ‘The Little Things that Run the City’ (Mata et al. 2015, 2016), and two of our  
624 co-authors were working for the City of Melbourne during the formation and early  
625 analysis of this research. Not unexpectedly, project findings have been contributing to  
626 inform City of Melbourne decision-making and policy, including the Council’s  
627 ‘Nature in the City Strategy’ (City of Melbourne 2017), which includes goals to  
628 increase indigenous biodiversity and specific targets to increase plant-related  
629 midstorey habitat for insects and other taxa. Project findings have also been applied to  
630 develop an insect biodiversity educational portal  
631 (<http://biodiversity.melbourne.vic.gov.au/insects/>) and a children’s book (Cranney et  
632 al. 2017). These non-academic outcomes highlight the value of our work and provide  
633 encouragement for future partnerships between industry professionals and researchers  
634 advocating for and evidencing the value of urban biodiversity.

635 Another significant approach that could be used by local governments to advance  
636 practice aimed at promoting insect biodiversity in urban environments is to  
637 incentivise the translation of research findings into landscape design guidelines. These  
638 non-mandatory documents, which have traditionally focused on aesthetic outcomes at  
639 the expense of biodiversity, can distinctly influence outcomes on the ground.

640 Ultimately however, contractors and consultants responsible for delivering capital  
641 works projects will overlook these if the required plants are not readily available  
642 when needed. Therefore, the crucial role played by plant nurseries should not be  
643 overlooked – an industry where supply tends to influence demand, with growers often

644 limiting production to reliable, profitable and easy to grow plants. Influencing plant  
645 supply will require a dedicated engagement with the nursery industry to broaden  
646 production to include a wider range of plant species known to support insect  
647 biodiversity as those provided evidence for in this study.  
648 Finally, while government officers may apply research findings to design greenspaces  
649 capable of supporting diverse insect communities, they must synergistically  
650 encourage operational and maintenance programs that can enable these communities  
651 to thrive. On ground operational and maintenance teams, that practice greenspace  
652 management on a regular basis, have the potential to be involved in identifying  
653 opportunities and challenges for supporting insects – and the plants they are more  
654 closely associated with – which may expand beyond the obvious choices available to  
655 or envisaged by office-based decision-makers. They are, for example, uniquely  
656 positioned to readily transfer knowledge on where the optimal soil and microhabitat  
657 conditions required for focal plant species within a given greenspace are met – a  
658 necessary prerequisite for these to be able to deliver the resources needed by insects  
659 to become established and thrive.

## 660 **Acknowledgments**

661 This study was funded by the City of Melbourne – thanks to Amy Rogers, Lingna  
662 Zhang and other colleagues from the Urban Sustainability Branch for their support  
663 and enthusiasm. We would also like to acknowledge funding from RMIT University's  
664 Strategic Projects in Urban Research (SPUR) Fund, the National Environmental  
665 Science Programme - Clean Air and Urban Landscapes Hub (NESP - CAUL) and the  
666 Australian Research Council - Centre of Excellence for Environmental Decisions  
667 (CEED). Thanks to Adam Ślipiński, Ascelin Gordon, David Heathcote, Dayanthi  
668 Nugegoda, Flickr community, Friends of Westgate Park, Jeff Shimeta, Laura Stark,

669 Marc Kéry, Michelle Freeman, Rolf Oberprieler, Royal Park managers, Shannon  
670 Fernandes, Timothy New and Xavier Francoeur for their invaluable contributions to  
671 the study.

672 **Literature cited**

673 Aguilera, G., J. Ekroos, A.S. Persson, L.B. Pettersson, and E. Öckinger. 2019.  
674 Intensive management reduces butterfly diversity over time in urban green spaces.  
675 *Urban Ecosystems* 22:335–344.

676 Aronson, M. F. J., C. A. Lepczyk, K. L. Evans, M. A. Goddard, S. B. Lerman, J. S.  
677 MacIvor, C. H. Nilon, and T. Vargo. 2017. Biodiversity in the city: key challenges for  
678 urban green space management. *Frontiers in Ecology and the Environment* 15:189–  
679 196.

680 Aronson, M. F. J., et al. 2014. A global analysis of the impacts of urbanization on bird  
681 and plant diversity reveals key anthropogenic drivers. *Proceedings of the Royal*  
682 *Society B* 281:20133330.

683 Aronson, M. F. J., et al. 2014. Hierarchical filters determine community assembly of  
684 urban species pools. *Ecological Applications* 97:2952–2963.

685 Baldock, K., et al. 2015. Where is the UK’s pollinator biodiversity? The importance  
686 of urban areas for flower-visiting insects. *Proceedings of the Royal Society of London*  
687 *B* 282: 20142849.

688 Baldock, K., et al. 2019. A systems approach reveals urban pollinator hotspots and  
689 conservation opportunities. *Nature Ecology and Evolution* 3:363–373.

690 Ballard, M., J. Hough-Goldstein, and D. Tallamy. 2013. Arthropod communities on  
691 native and nonnative early successional plants. *Environmental Entomology* 5: 851–  
692 859.

- 693 Barratt, B.I.P, C.M. Ferguson, R.A.S. Logan, D. Barton, N.L. Bell, S.U.  
694 Sarathchandra, and R.J. Townsend. 2005. Biodiversity of indigenous tussock  
695 grassland sites in Otago, Canterbury and the central North Island of New Zealand I.  
696 The macroinvertebrate fauna. *Journal of the Royal Society of New Zealand* 35:287–  
697 301.
- 698 Basset, Y., P.M. Hammond, H. Barrios, J.D. Holloway, and S.E. Miller. 2003.  
699 Vertical stratification of arthropod assemblages. Pages 17–27 in Y. Basset, V.  
700 Novotny, S.E. Miller, and R.L. Kitching, editors. *Arthropods of tropical forests:  
701 spatio-temporal dynamics and resource use in the canopy*. Cambridge University  
702 Press, Cambridge, UK.
- 703 Benett, A.B., and S.T. Lovell. 2014. A comparison of arthropod abundance and  
704 arthropod mediated predation services in urban green spaces. *Insect Conservation and  
705 Diversity* 7:405–412.
- 706 Beninde, J., M. Veith, and A. Hochkirch. 2015. Biodiversity in cities needs space: a  
707 meta-analysis of factors determining intra-urban biodiversity variation. *Ecology  
708 Letters* 18:581–592.
- 709 Brown, V.K. 1984. Secondary succession: insect-plant relationships. *BioScience* 34:  
710 710–716.
- 711 Brown, B.V., and E.A. Hartop. 2017. Big data from tiny flies: patterns revealed from  
712 over 42,000 phorid flies (Insecta: Diptera: Phoridae) collected over one year in Los  
713 Angeles, California, USA. *Urban Ecosystems* 20:521–534.
- 714 Bullock, J.M., D. Bonte, G. Pufal, C. da Silva Carvalho, D.S. Chapman, C. García, D.  
715 García, E. Matthysen, and M.M Delgado. 2018. Human-mediated dispersal and the  
716 rewiring of spatial networks. *Trend in Ecology and Evolution* 33:958–970.
- 717 Burghardt, K.T., and D.W. Tallamy. 2013. Plant origin asymmetrically impacts

718 feeding guilds and life stages driving community structure of herbivorous arthropods.  
719 Diversity and Distributions 19:1553–1565.

720 Burkman, C.E., and M.M. Gardiner. 2014. Urban greenspace composition and  
721 landscape context influence natural enemy community composition and function.  
722 Biological Control 75:58–67

723 Cadotte, M.W., S.L.E Yasui, S. Livingstone, and J.S. MacIvor. 2017. Are urban  
724 systems beneficial, detrimental, or indifferent for biological invasion? Biological  
725 Invasions 19:3489–3503.

726 Chen, H. 2016. VennDiagram: generate high-resolution Venn and Euler plots. R  
727 package version 1.6.17. <https://CRAN.R-project.org/package=VennDiagram>

728 City of Melbourne. 2017. Nature in the City – Thriving biodiversity and healthy  
729 ecosystems. City of Melbourne, Melbourne, Australia.

730 Cranney, K., S. Bekessy, and L. Mata. 2017. The Little Things that Run the City - 30  
731 amazing insect that live in Melbourne! City of Melbourne, Melbourne, Australia.

732 Dadvand, P., et al. 2015. Green spaces and cognitive development in primary  
733 schoolchildren. Proceedings of the National Academy of Science 112:7937–7942.

734 Dennis, P., M.R. Young, and I.J. Gordon. 1998. Distribution and abundance of small  
735 insects and arachnids in relation to structural heterogeneity of grazed, indigenous  
736 grasslands. Ecological Entomology 23:253–264

737 Dunn, R.R. 2010. Global mapping of ecosystem disservices: the unspoken reality that  
738 nature sometimes kills us. Biotropica 42:555–557.

739 Flies, E.J., C. Skelly, S.S. Negi, P. Prabhakaran, Q. Liu, K. Liu, F.C. Goldizen, C.  
740 Lease C, and P. Weinstein. 2017. Biodiverse green spaces: a prescription for global  
741 urban health. Frontiers in Ecology and the Environment 15:510–516.

742 Forister, M.L., L.A. Dyer, M.S. Singer, J.O. Stireman, and J.T. Lill. 2012. Revisiting  
743 the evolution of ecological specialization, with emphasis on insect–plant interactions.  
744 Ecology 93:981–991.

745 Gelman, A. and J. Hill. 2007. Data analysis using regression and  
746 multilevel/hierarchical models. Cambridge University Press, Cambridge, UK.

747 Gibb H., and S.A Cunningham. 2010. Revegetation of farmland restores function and  
748 composition of epigeaic beetle assemblages. Biological Conservation 143:677–687.

749 Goertzen, D., and F. Suhling (2014) Central European cities maintain substantial  
750 dragonfly species richness – a chance for biodiversity conservation? Insect  
751 conservation and diversity 8:238–246.

752 Haaland, C., R.E. Naisbit, and L. Bersier. 2011. Sown wildflower strips for insect  
753 conservation: a review. Insect Conservation and Diversity 4:60–80.

754 Hartig, T., and P.H. Kahn. 2016. Living in cities, naturally. Science 352:938–940.

755 Kellner, K. 2016. jagsUI: a wrapper around 'rjags' to streamline 'JAGS' analyses.  
756 Version 1.4.2. <https://CRAN.R-project.org/package=jagsUI>

757 Kennedy T.A., S. Naeem, K.M. Howe, J.M.H. Knops, D. Tilman, and P. Reich. 2002.  
758 Biodiversity as a barrier to ecological invasion. Nature 417:636–638.

759 Keniger, L., K.J. Gaston, K. Irvine, and R.A. Fuller. 2013. What are the benefits of  
760 interacting with nature? International Journal of Environmental Research and Public  
761 Health 10:913–935.

762 Kéry, M., and J.A. Royle. 2016. Applied hierarchical modeling in Ecology: analysis  
763 of distribution, abundance and species richness in R and BUGS Volume 1: prelude  
764 and static models. Academic Press, London, UK.

765 Ignatieva, M., et al. 2015. Lawn as cultural and ecological phenomenon: a conceptual

766 framework for transdisciplinary research. *Urban Forestry and Urban Greening*  
767 14:383–387.

768 Ikin, K., E. Knight, D.B. Lindenmayer, J. Fischer, and A.D. Manning. 2013. The  
769 influence of native versus exotic streetscape vegetation on the spatial distribution of  
770 birds in suburbs and reserves. *Diversity and Distributions* 19:294–306.

771 Ikin, K., D.S. Le Roux, L. Rayner, N.R. Villasenor, K. Eyles, P. Gibbons, A.D.  
772 Manning, and D.B. Lindenmayer. 2015. Key lessons for achieving biodiversity-  
773 sensitive cities and towns. *Ecological Management and Restoration* 16:206–214.

774 Ives, C.D., and Y. Lynch. 2014. Untapping the potential of science-government  
775 partnerships to benefit urban nature. *The Nature of Cities*, August 2014.

776 Lai, H., E.J. Flies, P. Weinstein, and A. Woodward. 2019. The impact of green space  
777 and biodiversity on health. *Frontiers in Ecology and the Environment* 17:383–390.

778 Landis, D.A., S.D. Wratten, and G.M. Gurr. 2000. Habitat management to conserve  
779 natural enemies of arthropod pests in agriculture. *Annual Review of Entomology*  
780 45:175–201.

781 Le Roux, D.S., K. Ikin, D.B. Lindenmayer, W. Blanchard, A.D. Manning, and P.  
782 Gibbons. 2014. Reduced availability of habitat structures in urban landscapes:  
783 implications for policy and practice. *Landscape and Urban Planning*, 125:57–64.

784 Lepczyk, C.A., M.F.J. Aronson, K.L. Evans, M.A. Goddard, S.B. Lerman, J.S.  
785 MacIvor. 2017. Biodiversity in the city: fundamental questions for understanding the  
786 ecology of urban green spaces for biodiversity conservation. *BioScience* 67:799–807.

787 Madre, F., A. Vergnes, N. Machon, and P. Clergeau. 2013. A comparison of 3 types  
788 of green roof as habitats for arthropods. *Ecological Engineering* 57:109–117.



- 789 Majer, J.D., K.E.C. Brennan, and M.L. Moir. 2007. Invertebrates and the restoration  
790 of a forest ecosystem: 30 years of research following bauxite mining in Western  
791 Australia. *Restoration Ecology* 15:S104–S115.
- 792 Majewska, A.A., and S. Altizer. 2020. Planting gardens to support insect pollinators.  
793 *Conservation Biology* 34:15–25.
- 794 Maller, C., L. Mumaw, and B. Cooke. 2018. Health and social benefits of living with  
795 ‘wild’ nature. Pages in N. Pettorelli, S.M Durant, and J.T. Du Toit, editors.  
796 *Rewilding*. Cambridge University Press, Cambridge, UK.
- 797 Mata, L., G. Garrard, F. Fidler, C.D Ives, C. Maller, J. Wilson, F. Thomas, and S.  
798 Bekessy. (2019) Punching above their weight: the ecological and social benefits of  
799 pop-up parks. *Frontiers in Ecology and the Environment* 17:341–347.
- 800 Mata, L., C.G. Threlfall, N.S.G. Williams, A.K. Hahs, M. Malipatil, S.E. Stork and  
801 S.J. Livesley. 2017. Conserving herbivorous and predatory insects in urban green  
802 spaces. *Scientific Reports* 7:40970.
- 803 Mata, L., C.E. Ramalho, J. Kennedy, K.M. Parris, L. Valentine, M. Miller, S.  
804 Bekessy, S. Hurley, and Z. Cumpston (2020) Bringing nature back into cities. *People*  
805 *and Nature*.
- 806 Mata, L., et al. 2015. The Little Things that Run the City: how do Melbourne’s green  
807 spaces support insect biodiversity and ecosystem health? City of Melbourne,  
808 Melbourne, Australia.
- 809 Mata, L., et al. 2016. The Little Things that Run the City – Insect ecology,  
810 biodiversity and conservation in the City of Melbourne. City of Melbourne,  
811 Melbourne, Australia.
- 812 Matteson, K.C., and G.A. Langellotto. 2010. Determinates of inner city butterfly and  
813 bee species richness. *Urban Ecosystems* 13:333–347.

- 814 McGregor-Fors, I., et al. 2016. City “green” contributions: the role of urban  
815 greenspaces as reservoirs for biodiversity. *Forests* 7:146.
- 816 Moir, M.M., K.E.C. Brennan, J.M. Koch, J.D. Majer, and M.J. Fletcher. 2005.  
817 Restoration of a forest ecosystem: The effects of vegetation and dispersal capabilities  
818 on the reassembly of plant-dwelling arthropods. *Forest Ecology and Management*  
819 217:294–306.
- 820 Morris, M.G. 2000. The effect of structure and its dynamics on the ecology and  
821 conservation of arthropods in British grasslands. *Biological Conservation* 95:129–  
822 142.
- 823 Murdoch, W.W, F.C. Evans, and C.H. Peterson. 1972. Diversity and pattern in plants  
824 Nemeč, K.T., and T.B. Bragg. 2008. Plant-feeding hemiptera and orthoptera  
825 communities in native and restored mesic tallgrass prairies. *Restoration Ecology* 16:  
826 324–335.
- 827 New, T.R. 2015. *Insect conservation and urban environments*. Springer.
- 828 Nilon, C.H., et al. 2017. Planning for the future of urban biodiversity: a global review  
829 of city-scale initiatives. *BioScience* 67:332–342.
- 830 Norton, B.A., et al. 2019. Urban meadows as an alternative to short mown grassland:  
831 effects of composition and height on biodiversity. *Ecological Applications* 29:e01946.
- 832 Oksanen, J., et al. 2016. *vegan: community ecology package*. R package version 2.3-  
833 4. <https://CRAN.R-project.org/package=vegan>
- 834 Paap, T., T.I. Burgess, and M.J. Wingfield. 2017. Urban trees: bridge-heads for forest  
835 pest invasions and sentinels for early detection. *Biological Invasions* 19:3515–3526.
- 836 Parris, K.M., et al. 2018. The seven lamps of planning for biodiversity in the city.  
837 *Cities* 83:44–53.

- 838 Piroozfar, P., E.R.P Farr, E. Aboagye-Nimo, and J. Osei-Berchie. 2019. Crime  
839 prevention in urban spaces through environmental design: a critical UK perspective.  
840 *Cities* 95:102411.
- 841 Plummer, M. 2003. JAGS: a program for analysis of Bayesian graphical models using  
842 Gibbs sampling. *In* K. Hornik, et al., editors. Proceedings of the 3rd International  
843 Workshop on Distributed Statistical Computing.
- 844 Potts, S.G., B.A. Woodcock, S.P.M. Roberts, T. Tscheulin, E.S. Pilgrim, V.K. Brown,  
845 and J.R. Tallwin. 2009. Enhancing pollinator biodiversity in intensive grasslands.  
846 *Journal of Applied Ecology* 46:369–379.
- 847 Prather, C.M., et al. 2013. Invertebrates, ecosystem services and climate change.  
848 *Biological Reviews* 88:327–348.
- 849 Procheş, S., J.R.U Wilson, D.M Richardson, and S.L. Chown. 2008. Herbivores, but  
850 not other insects, are scarce on alien plants. *Austral Ecology* 33:691–700.
- 851 Pysek, P., et al. 2010. Contrasting patterns in the invasions of European terrestrial and  
852 freshwater habitats by alien plants, insects and vertebrates. *Global Ecology and*  
853 *Biogeography* 19:317–331.
- 854 Requier, F., and S.D. Leonhardt. 2020. Beyond flowers: including non-floral  
855 resources in bee conservation schemes. *Journal of Insect Conservation* 24:5–16.
- 856 Roques, A., W. Rabitsch, J. Rasplus, C. Lopez-Vaamonde, W. Nentwig, and M.  
857 Kenis. 2009. Alien terrestrial invertebrates of Europe. Pages 63–79 in DAISIE,  
858 editors. *Handbook of alien species in Europe*. Springer, Dordrecht, The Netherlands.
- 859 Roulston, T.H., and K. Goodell. 2011. The role of resources and risks in regulating  
860 wild bee populations. *Annual Review of Entomology* 56:293–312.
- 861 Rust, M.K., and N.Y. Su. 2012. Managing social insects of urban importance. *Annual*  
862 *Review of Entomology* 57:355–375.

863 Saarinen, K., A. Valtonen, J. Jantunen, and S. Saarnio. 2005. Butterflies and diurnal  
864 moths along road verges: Does road type affect diversity and abundance? *Biological*  
865 *Conservation* 123:403–412.

866 Salisbury, A., J. Armitage, H. Bostock, J. Perry, M. Tatchell, and K. Thompson. 2015.  
867 Enhancing gardens as habitats for flower-visiting aerial insects (pollinators): should  
868 we plant native or exotic species? *Journal of Applied Ecology* 52:1156–1164.

869 Salisbury, A., S. Al-Beidh, J. Armitage, S. Bird, H. Bostock, A. Platoni, M. Tatchell,  
870 K. Thompson, and J. Perry. 2017. Enhancing gardens as habitats for plant-associated  
871 invertebrates: should we plant native or exotic species? *Biodiversity Conservation*  
872 26:2657–2673.

873 Sattler, T., M. Obrist, P. Duelli, and M. Moretti. 2011. Urban arthropod communities:  
874 added value or just a blend of surrounding biodiversity? *Landscape and Urban*  
875 *Planning* 103:347–361.

876 Schuldt, A., et al. 2019. Multiple plant diversity components drive consumer  
877 communities across ecosystems. *Nature Communications* 10:1460.

878 Sing, K., W.F.A. Jusoh, N.R. Hashim, and J. Wilson. 2016. Urban parks: refuges for  
879 tropical butterflies in Southeast Asia? *Urban Ecosystems* 19:1131–1147.

880 Smith, L.S., M.E.J. Broyles, H.K. Larzleer, and M.D.E. Fellowes. 2015. Adding  
881 ecological value to the urban lawnscape. Insect abundance and diversity in grass-free  
882 lawns. *Biodiversity Conservation* 24:47–62.

883 Soanes, K., M. Sievers, Y.E. Chee, N.S.G. Williams, M. Bhardwaj, A.J. Marshall, and  
884 K.M. 2019. Correcting common misconceptions to inspire conservation action in  
885 urban environments. *Conservation Biology* 33:300–306.

886 Soliveres, S., et al. 2016 Biodiversity at multiple trophic levels is needed for  
887 ecosystem multifunctionality. *Nature* 536:456–459.

- 888 Threlfall, C.G., K. Walker, N.S.G. Williams, A.K. Hahs, L. Mata, N. Stork, and S.J.  
889 Livesley. 2015. The conservation value of urban green space habitats for Australian  
890 native bee communities. *Biological Conservation* 187:240–248.
- 891 Threlfall, C.G., A. Ossola, A.K. Hahs, N.S.G Williams, L. Wilson, and S.J. Livesley.  
892 2016. Variation in vegetation structure and composition across urban green space  
893 types. *Frontiers in Ecology and Evolution* 4:66.
- 894 Threlfall, CG., L. Mata, J. Mackie, A.H. Hahs, N. Stork, N.S.G. Williams, S.J.  
895 Livesley. 2017. Increasing biodiversity in urban green spaces through simple  
896 vegetation interventions. *Journal of Applied Ecology* 54:1874–1883.
- 897 Tresch, S., D. Frey, R. Le Bayon, P. Mäder, B. Stehle, A. Fliessbach, and M. Moretti.  
898 2019. Direct and indirect effects of urban gardening on aboveground and  
899 belowground diversity influencing soil multifunctionality. *Scientific Reports* 9:9769.
- 900 Tschardtke, T., and H. Greiler. 1995. Insect communities, grasses and grasslands.  
901 *Annual Review of Entomology* 40:535–558.
- 902 Ulyshen, M.D. 2011. Arthropod vertical stratification in temperate deciduous forests:  
903 implications for conservation-oriented management. *Forest Ecology and Management*  
904 261:1479–1489.
- 905 United Nations. 2017. *The new urban agenda*. United Nations, New York, USA.
- 906 Valentine, L.E., C.E. Ramalho, L. Mata, M.D. Craig, P.L. Kennedy, and R.J. Hobbs.  
907 2020. Opportunities and risks of novel resources for species conservation. *Frontiers in*  
908 *Ecology and the Environment*.
- 909 Ward, D., and E. Edney-Browne. 2015. Poles apart: comparing trends of alien  
910 Hymenoptera in New Zealand with Europe (DAISIE). *PlosOne* 10:e0132264.
- 911 Woodcock, B.A., et al. 2007. The potential of grass field margin management for

912 enhancing beetle diversity in intensive livestock farms. *Journal of Applied Ecology*  
913 44:60–69.

914 Woodcock, B.A., S.G. Potts, T. Tscheulin, E. Pilgrim, A.J. Ramsey, J.

915 Harrison & Cripps, V.K. Brown, and J.R. Tallwin. 2009. Responses of invertebrate  
916 trophic level, feeding guild and body size to the management of improved grassland  
917 field margins. *Journal of Applied Ecology* 46:920–929.

### 918 **Figure legends**

919 Figure 1 Visual representation of the planting design element by plant origin (a) and  
920 midstorey growth form by plant origin (b) groups that were part of the theoretical and  
921 empirical dimensions of this study. Dimmed boxes in (b) indicate theoretical  
922 combinations of midstorey growth form by plant origin groups that did/may not occur  
923 in the study area or that occur but not at surveyable densities within the study's plots.

924 Figure 2 Estimated species richness of introduced and indigenous insect species at the  
925 average plant species across the study (a) and at each surveyed plant species (b).

926 Estimated probabilities of occurrence of introduced and indigenous insect species at  
927 the average plant species across the study (c) and at each surveyed plant species (d).

928 In all figures the black lines represent mean responses; the grey boxes in (a) and (c)  
929 represent the associated statistical uncertainty (95% Credible Intervals). Y-axis in (b)  
930 drawn in the log<sub>10</sub> scale.

931 Figure 3 Estimated species richness of indigenous insects by planting design element  
932 (a), midstorey growth form (b) and plant origin (c). Black lines represent mean  
933 responses and grey boxes the associated statistical uncertainty (95% Credible  
934 Intervals).

935 Figure 4 Estimated species richness of indigenous insect by planting design element  
936 by plant origin (a) and midstorey growth form by plant origin (b). Black lines

937 represent mean responses and coloured boxes the associated statistical uncertainty  
938 (95% Credible Intervals). For ease of interpretation plant origin has been colour coded  
939 as yellow (nonnative), orange (native) or blue (indigenous).

940 Figure 5 Estimated species richness of indigenous insects by planting design element  
941 by plant origin (a,c,e,g,i) and midstorey growth form by plant origin (b,d,f,h,j) for  
942 pollinators (a,b), herbivores (c,d), predators (e,f), parasitoids (g,h) and detritivores  
943 (i,j). Black lines represent mean responses and coloured boxes the associated  
944 statistical uncertainty (95% Credible Intervals). For ease of interpretation plant origin  
945 has been colour coded as yellow (nonnative), orange (native) or blue (indigenous).

946 Figure 6 Indigenous insect community dissimilarity matrices for the planting design  
947 element by plant origin (a) and midstorey growth form by plant origin (b) groups.  
948 Percentages in the white cells were calculated using the Jaccard dissimilarity index,  
949 where 0 and 1 represents minimum and maximum dissimilarity, respectively. Values  
950 in the adjacent left columns represent the percentage of unique species observed in  
951 each group.



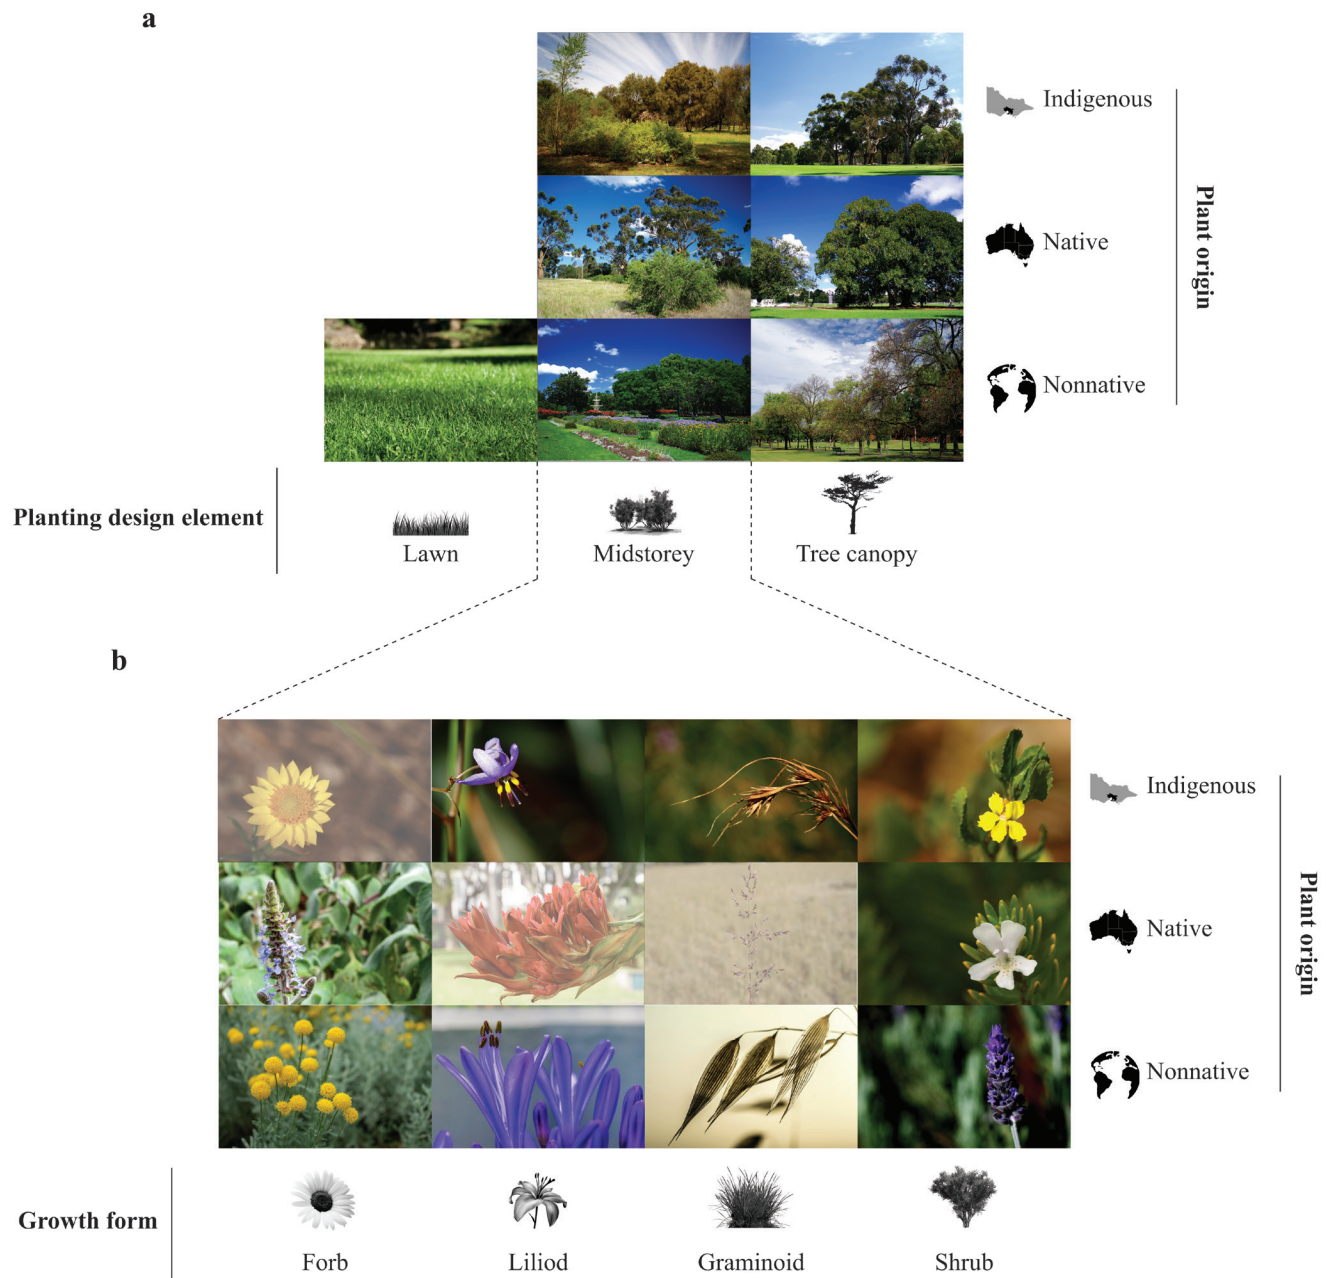

**Figure 1.** Visual representation of the planting design element by plant origin (a) and midstorey growth form by plant origin (b) groups that were part of the theoretical and empirical dimensions of this study. Dimmed boxes in (b) indicate theoretical combinations of midstorey growth form by plant origin groups that did/may not occur in the study area or that occur but not at surveyable densities within the study's plots.



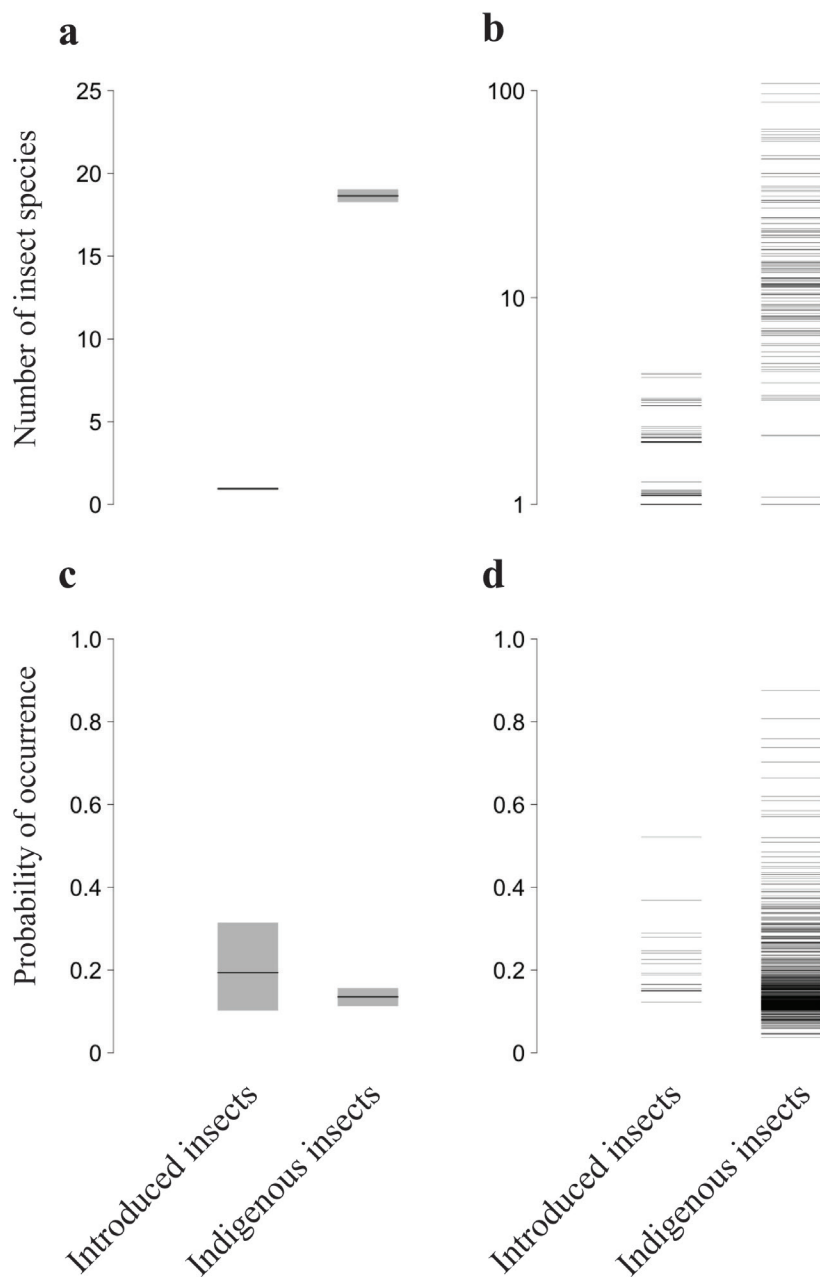

**Figure 2.** Estimated species richness of introduced and indigenous insect species at the average plant species across the study (a) and at each surveyed plant species (b). Estimated probabilities of occurrence of introduced and indigenous insect species at the average plant species across the study (c) and at each surveyed plant species (d). In all figures the black lines represent mean responses; the grey boxes in (a) and (c) represent the associated statistical uncertainty (95% Credible Intervals). Y-axis in (b) drawn in the log<sub>10</sub> scale.

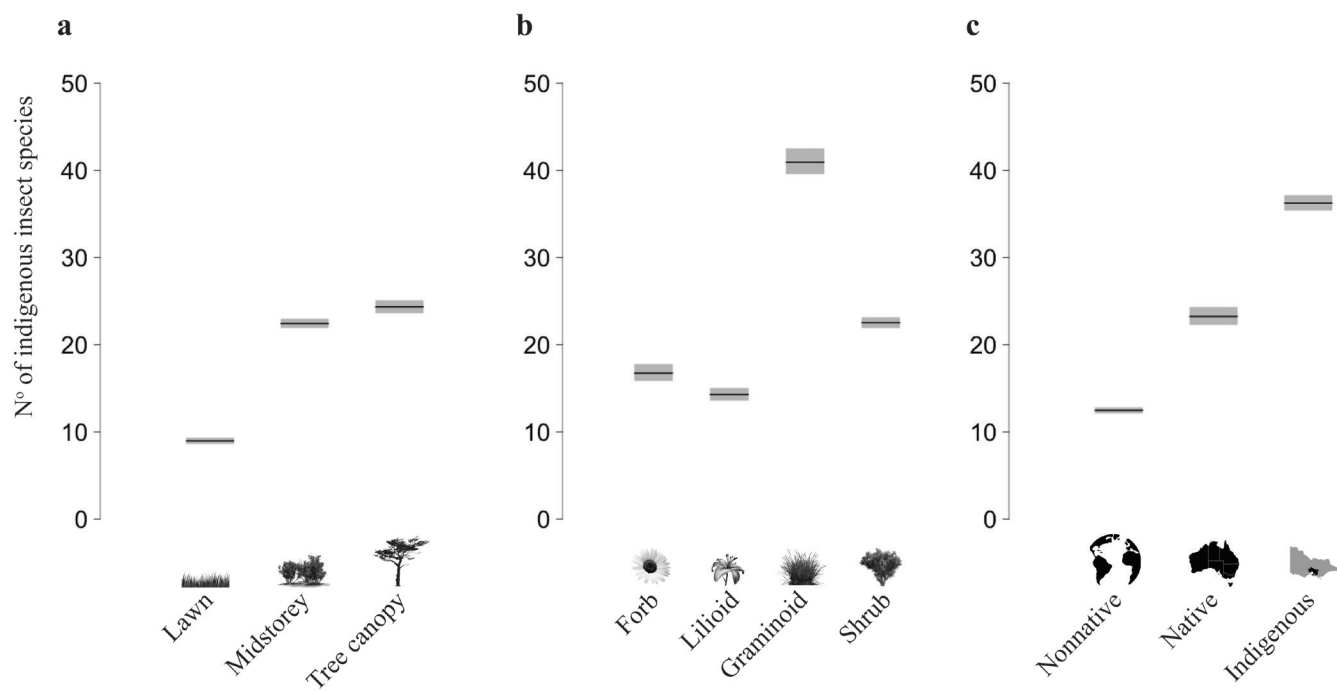

**Figure 3.** Estimated species richness of indigenous insects by planting design element (a), midstorey growth form (b) and plant origin (c). Black lines represent mean responses and grey boxes the associated statistical uncertainty (95% Credible Intervals).

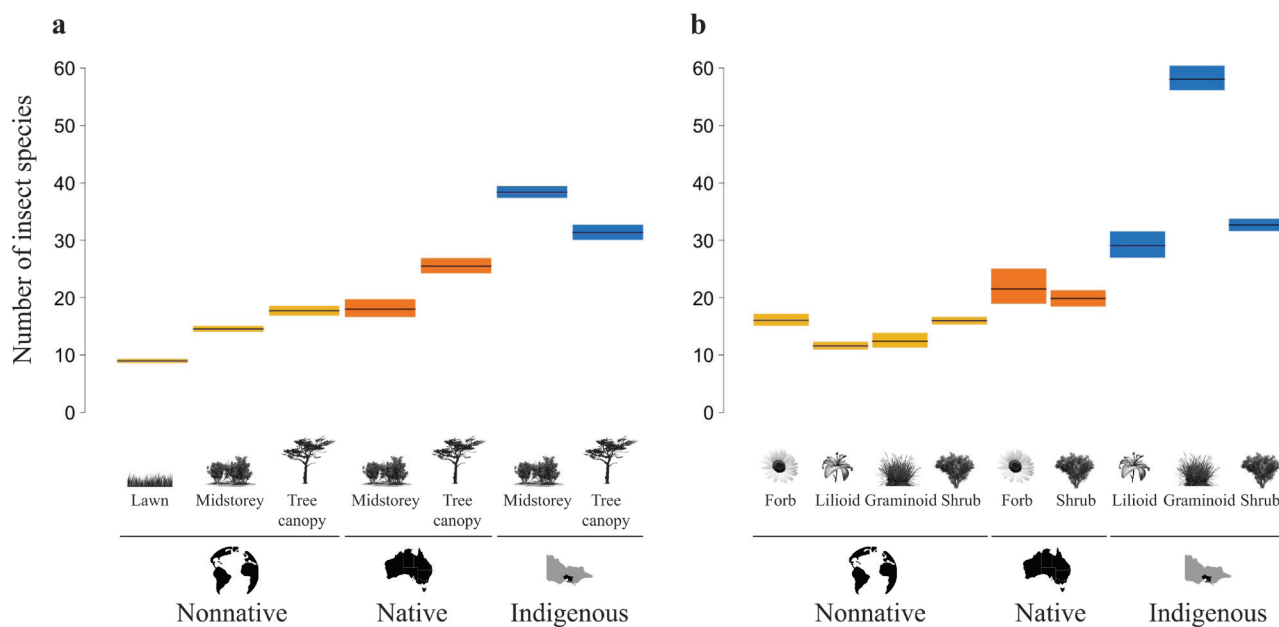

**Figure 4.** Estimated species richness of indigenous insect by planting design element by plant origin (a) and midstorey growth form by plant origin (b). Black lines represent mean responses and coloured boxes the associated statistical uncertainty (95% Credible Intervals). For ease of interpretation plant origin has been colour coded as yellow (nonnative), orange (native) or blue (indigenous).

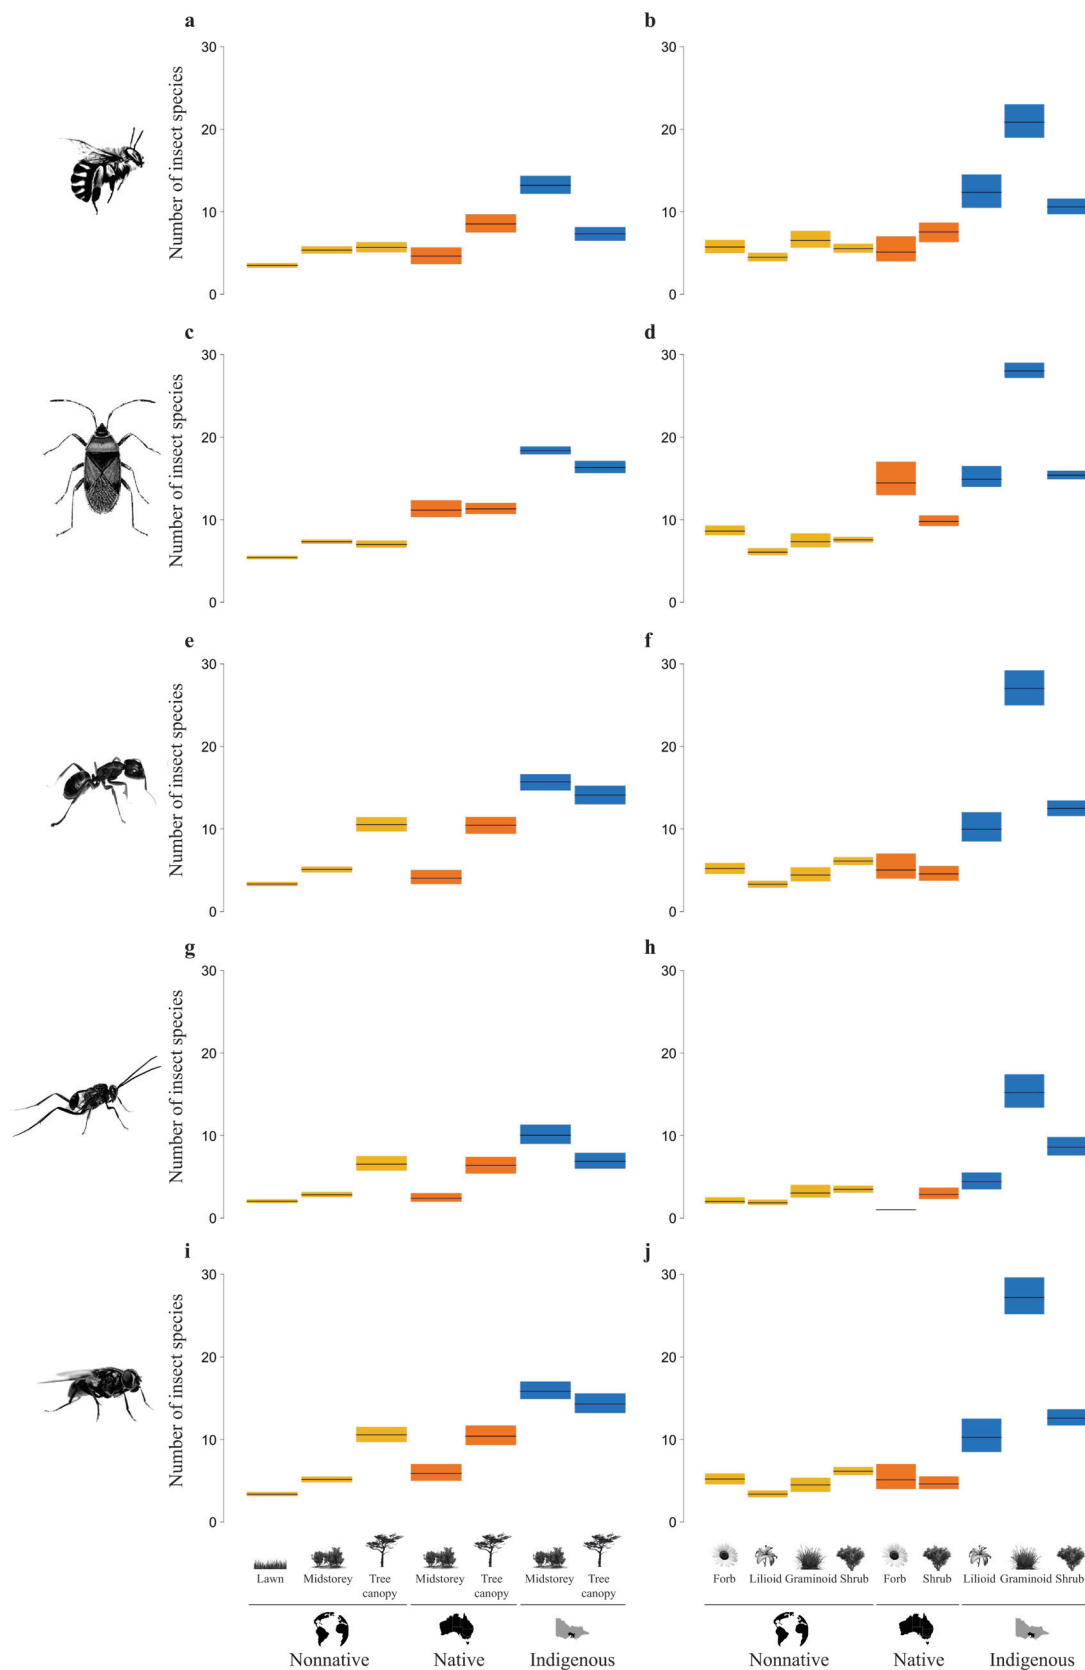

**Figure 5.** Estimated species richness of indigenous insects by planting design element by plant origin (a,c,e,g,i) and midstorey growth form by plant origin (b,d,f,h,j) for pollinators (a,b), herbivores (c,d), predators (e,f), parasitoids (g,h) and detritivores (i,j). Black lines represent mean responses and coloured boxes the associated statistical uncertainty (95% Credible Intervals). For ease of interpretation plant origin has been colour coded as yellow (nonnative), orange (native) or blue (indigenous).

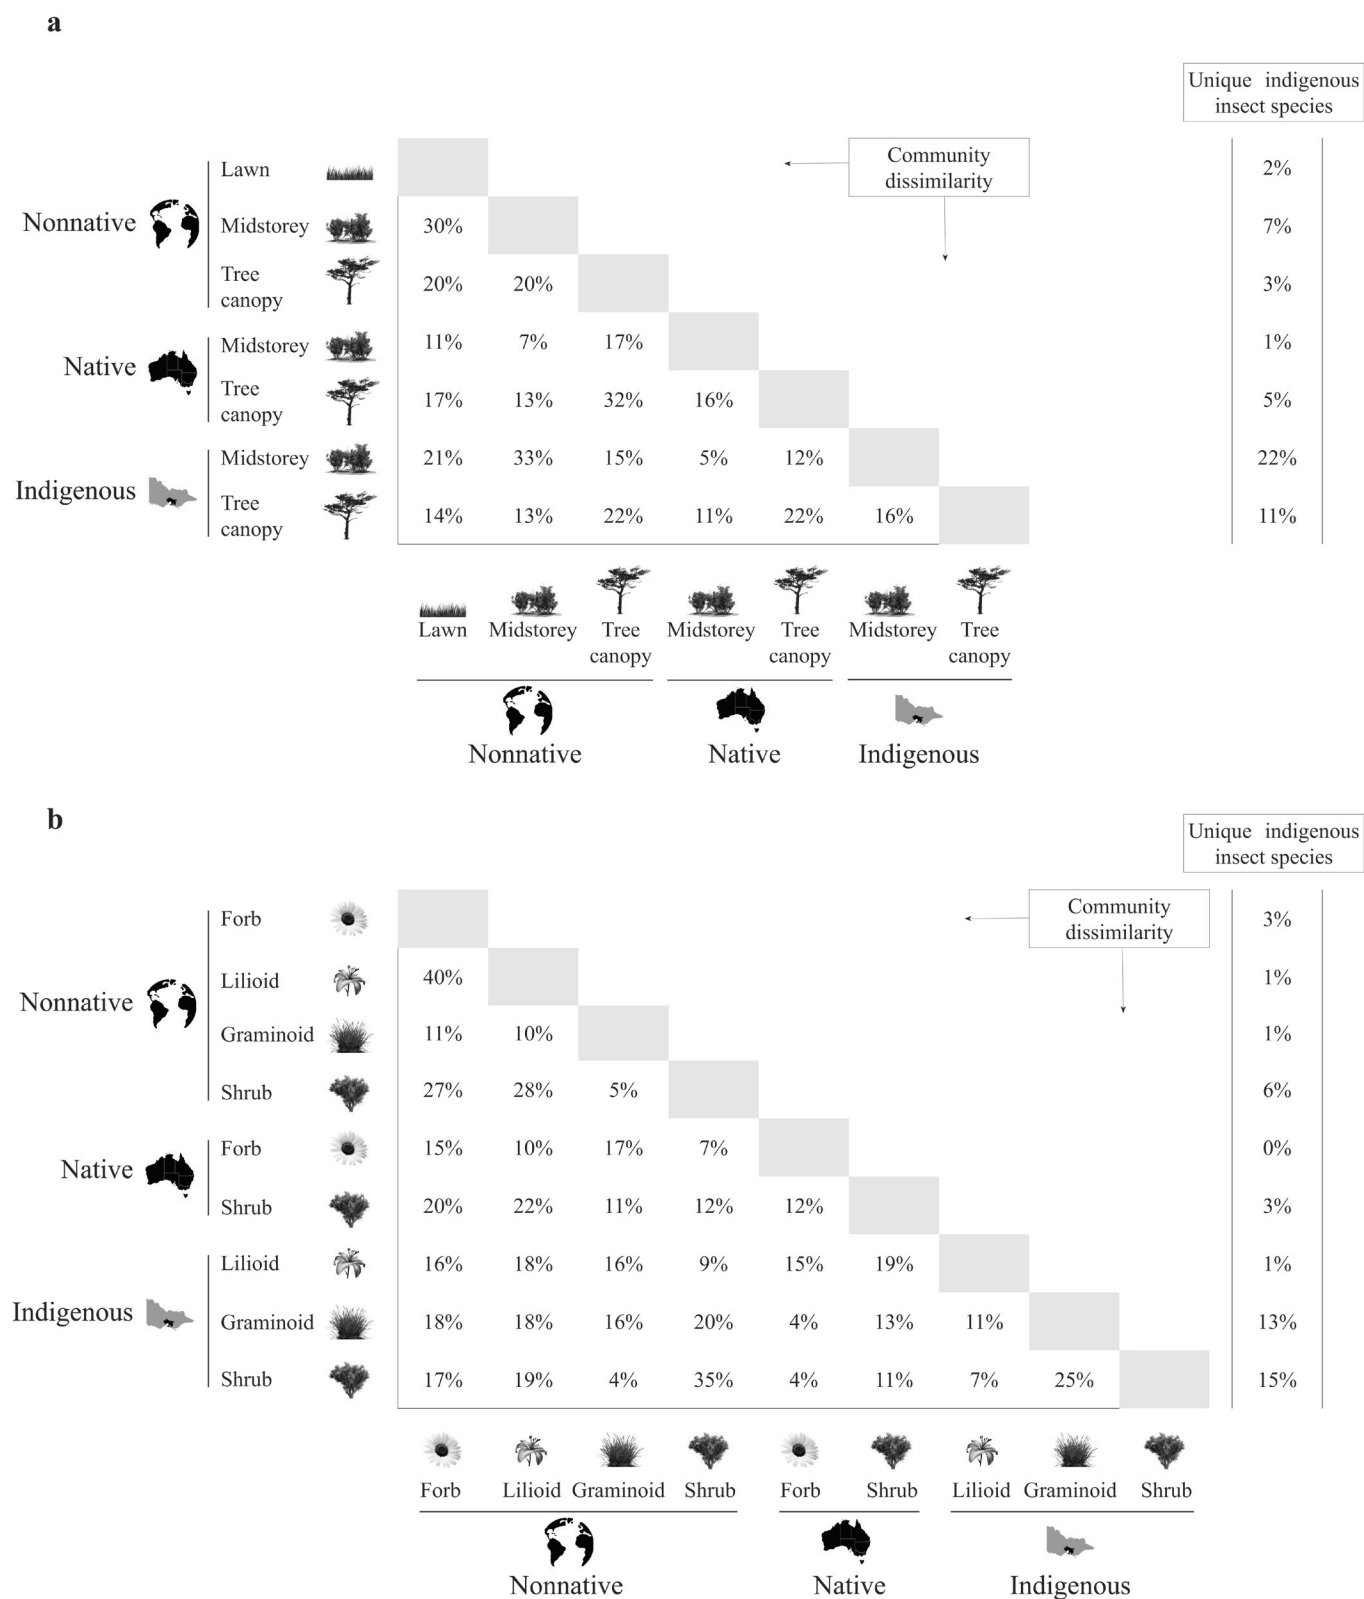

**Figure 6.** Indigenous insect community dissimilarity matrices for the planting design element by plant origin (a) and midstorey growth form by plant origin (b) groups. Percentages in the white cells were calculated using the Jaccard dissimilarity index, where 0 and 1 represents minimum and maximum dissimilarity, respectively. Values in the adjacent left columns represent the percentage of unique species observed in each group.
